# Supplementary material
Source: PubMed Central journal article supplement (PMC1855392)

A

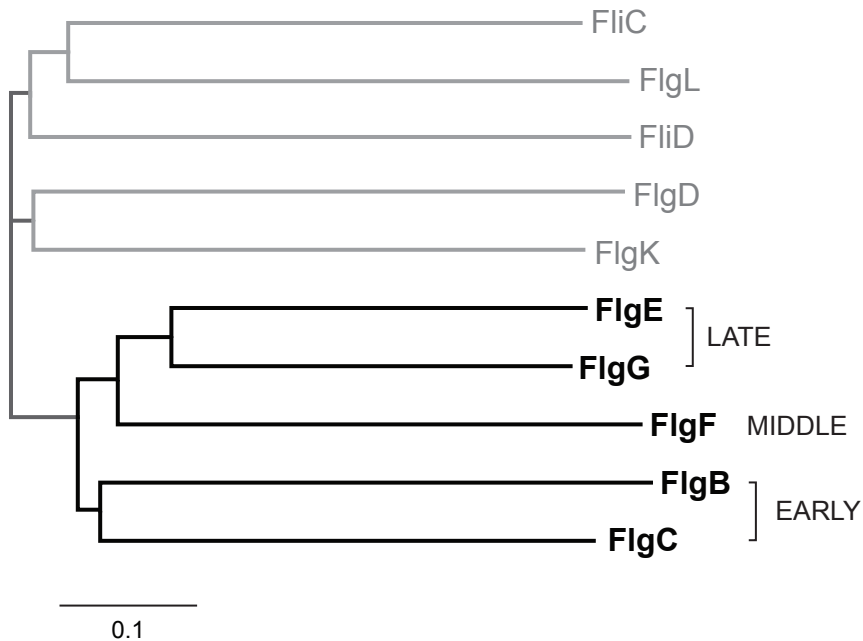

Supplement: pnas_0700266104_1.pdf [file pnas_0700266104_1.pdf]

**B**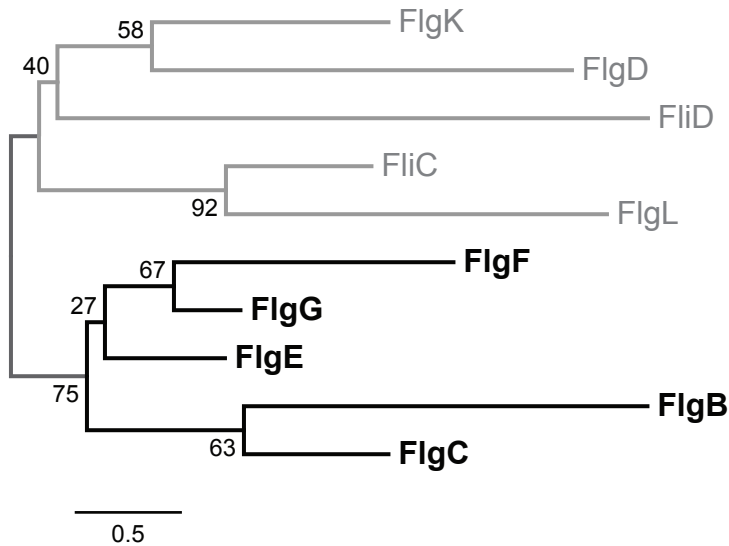

Supplement: pnas_0700266104_2.pdf [file pnas_0700266104_2.pdf]
